# Supplementary material for: MicroRNA Promoter Identification in Arabidopsis Using Multiple Histone Markers
Source: Biomed Res Int. 2015 Sep 3;2015:861402. doi: 10.1155/2015/861402 (PMC4573627; doi:10.1155/2015/861402)
Supplement: Supplementary file 1 — The additional file provides 132 predicted TSSs of miRNAs which are overlapping with TSSs of upstream nearest genes. [file 861402.f1.xls]

## Sheet: Sheet1
Supplementary Table S1. 132 predicted TSSs of miRNAs which are overlapping with TSSs of upstream nearest genes						t
microRNA ID	microRNA name	microRNA coordinates	Upstream Gene	Gene coordinates	position between microRNAs and Upstream Genes
MI0005394	ath-MIR838	chr1:28500-28706(+)	AT1G01040	chr1:23146-31227(+)	ingene
MI0010632	ath-MIR2112	chr1:234006-234159(-)	AT1G01650	chr1:232841-237817(-)	ingene
MI0019213	ath-MIR5640	chr1:1653221-1653624(-)	AT1G05570	chr1:1647706-1659437(-)	ingene
MI0019240	ath-MIR5656	chr1:1727263-1727415(+)	AT1G05780	chr1:1726608-1728404(+)	ingene
MI0005410	ath-MIR847	chr1:2165517-2165746(+)	AT1G07050	chr1:2164188-2165239(-)
MI0005102	ath-MIR472	chr1:4182132-4182299(-)	AT1G12290	chr1:4178359-4182593(-)	ingene
MI0000982	ath-MIR169h	chr1:6695420-6695609(-)	AT1G19373	chr1:6697178-6697253(+)
MI0005111	ath-MIR781a	chr1:7423518-7423611(+)	AT1G21200	chr1:7421217-7423143(+)
MI0001020	ath-MIR399a	chr1:10227073-10227195(+)	AT1G29260	chr1:10224815-10226205(+)
MI0000975	ath-MIR167d	chr1:11137539-11137915(+)	AT1G31170	chr1:11133410-11134844(+)
MI0001073	ath-MIR404	chr1:11230463-11230612(-)	AT1G31360	chr1:11232333-11237530(+)
MI0001069	ath-MIR400	chr1:11785936-11786037(+)	AT1G32583	chr1:11785806-11788286(+)	ingene
MI0019237	ath-MIR5654	chr1:11786292-11786371(+)	AT1G32583	chr1:11785806-11788286(+)	ingene
MI0005433	ath-MIR856	chr1:11957460-11957730(+)	AT1G32990	chr1:11955785-11957284(+)
MI0019255	ath-MIR5666	chr1:12035047-12035135(+)	AT1G33170	chr1:12027084-12030539(+)
MI0014666	ath-MIR773b	chr1:13050667-13050864(-)	AT1G35470	chr1:13051410-13055014(-)
MI0017894	ath-MIR5024	chr1:16766259-16766438(-)	AT1G44100	chr1:16764405-16767685(-)	ingene
MI0017895	ath-MIR5025	chr1:16993891-16994045(+)	AT1G44920	chr1:16982904-16984419(-)
MI0019253	ath-MIR5664	chr1:17386795-17387008(+)	AT1G47400	chr1:17385717-17386186(+)
MI0019251	ath-MIR5663	chr1:18686855-18686966(-)	AT1G50450	chr1:18687785-18690371(-)
MI0000978	ath-MIR169d	chr1:20039463-20039616(-)	AT1G53690	chr1:20042640-20043344(-)
MI0019229	ath-MIR5635b	chr1:20622538-20622719(-)	AT1G55280	chr1:20622960-20624630(-)
MI0001084	ath-MIR158b	chr1:20772218-20772302(+)	AT1G55590	chr1:20769320-20771871(-)
MI0019248	ath-MIR5649b	chr1:21360151-21360251(-)	AT1G57680	chr1:21362488-21364728(-)
MI0019223	ath-MIR5647	chr1:22084264-22084683(-)	AT1G59990	chr1:22090238-22093060(-)
MI0005436	ath-MIR859	chr1:22149718-22149843(+)	AT1G60070	chr1:22142604-22149527(-)
MI0005104	ath-MIR774a	chr1:22149936-22150033(+)	AT1G60070	chr1:22142604-22149527(-)
MI0014668	ath-MIR774b	chr1:22150128-22150266(+)	AT1G60070	chr1:22142604-22149527(-)
MI0017891	ath-MIR5022	chr1:22372462-22372578(+)	AT1G60780	chr1:22368953-22372159(-)
MI0015816	ath-MIR4227	chr1:22372670-22372790(+)	AT1G60780	chr1:22368953-22372159(-)
MI0005398	ath-MIR842	chr1:22577067-22577265(+)	AT1G61215	chr1:22572645-22575527(+)
MI0005106	ath-MIR776	chr1:22795618-22795735(+)	AT1G61730	chr1:22793219-22794703(-)
MI0000990	ath-MIR171c	chr1:22930089-22930204(-)	AT1G62040	chr1:22932760-22934549(+)
MI0001424	ath-MIR413	chr1:23058034-23058156(+)	AT1G62350	chr1:23056653-23058114(+)
MI0017886	ath-MIR5018	chr1:24543740-24544014(-)	AT1G65950	chr1:24546704-24551144(-)
MI0017882	ath-MIR5014a	chr1:24553909-24554049(+)	AT1G65960	chr1:24552003-24557730(+)	ingene
MI0005395	ath-MIR839	chr1:25278944-25279207(-)	AT1G67490	chr1:25280451-25286611(-)
MI0001010	ath-MIR395d	chr1:26269979-26270078(-)	AT1G69800	chr1:26274230-26276329(-)
MI0001011	ath-MIR395e	chr1:26272776-26272870(-)	AT1G69800	chr1:26274230-26276329(-)
MI0005435	ath-MIR858a	chr1:26773539-26773725(-)	AT1G71010	chr1:26782839-26788970(+)
MI0005391	ath-MIR835	chr1:28544454-28544853(-)	AT1G76065	chr1:28544338-28545376(-)	ingene
MI0001071	ath-MIR402	chr1:29016520-29016828(+)	AT1G77230	chr1:29016120-29019768(+)	ingene
MI0019230	ath-MIR833b	chr1:29525202-29525286(-)	AT1G78480	chr1:29525501-29526363(-)
MI0005396	ath-MIR840	chr2:771337-771562(-)	AT2G02750	chr2:771151-773540(-)	ingene
MI0001017	ath-MIR398a	chr2:1040938-1041042(+)	AT2G03440	chr2:1039205-1040118(-)
MI0019204	ath-MIR5632	chr2:8392449-8392608(-)	AT2G19390	chr2:8389800-8397862(-)	ingene
MI0001082	ath-MIR156g	chr2:8412516-8412618(-)	AT2G19430	chr2:8415159-8417960(+)
MI0017880	ath-MIR5012	chr2:8432648-8432796(+)	AT2G19460	chr2:8431482-8432105(+)
MI0001074	ath-MIR405a	chr2:9634957-9635113(-)	AT2G22670	chr2:9636380-9638745(+)
MI0017884	ath-MIR5016	chr2:9919984-9920197(+)	AT2G23310	chr2:9917520-9919258(+)
MI0005400	ath-MIR844	chr2:9942151-9942335(-)	AT2G23348	chr2:9941189-9942814(-)	ingene
MI0005387	ath-MIR831	chr2:10247206-10247462(+)	AT2G24100	chr2:10244886-10246919(+)
MI0017887	ath-MIR5019	chr2:10403230-10403370(+)	AT2G24500	chr2:10401035-10402934(-)
MI0005439	ath-MIR862	chr2:10718096-10718198(+)	AT2G25169	chr2:10712606-10714014(-)	ingene
MI0005381	ath-MIR825	chr2:11159660-11159845(+)	AT2G26210	chr2:11157118-11159292(+)
MI0001024	ath-MIR399e	chr2:14443504-14443612(+)	AT2G34200	chr2:14440648-14442005(+)
MI0001025	ath-MIR399f	chr2:14444997-14445114(+)	AT2G34200	chr2:14440648-14442005(+)
MI0008303	ath-MIR1886	chr2:15611870-15611982(+)	AT2G37160	chr2:15608827-15612934(+)	ingene
MI0000190	ath-MIR160a	chr2:16340279-16340363(+)	AT2G39170	chr2:16334630-16336210(-)
MI0001003	ath-MIR393a	chr2:16652101-16652233(+)	AT2G39880	chr2:16647945-16649479(-)
MI0001086	ath-MIR319c	chr2:17029701-17029899(+)	AT2G40802	chr2:17028304-17028405(-)
MI0005108	ath-MIR778	chr2:17349437-17349574(-)	AT2G41620	chr2:17347304-17355084(-)	ingene
MI0019234	ath-MIR156j	chr2:17589020-17589087(-)	AT2G42210	chr2:17590191-17591852(+)
MI0001085	ath-MIR159c	chr2:18994632-18994856(+)	AT2G46250	chr2:18991171-18993327(+)
MI0000197	ath-MIR164a	chr2:19520752-19520864(+)	AT2G47570	chr2:19515898-19517361(-)
MI0000188	ath-MIR158a	chr3:3366331-3366430(-)	AT3G10750	chr3:3366927-3368269(+)
MI0000991	ath-MIR172c	chr3:3599776-3599908(-)	AT3G11440	chr3:3602093-3605104(+)
MI0000212	ath-MIR169a	chr3:4358994-4359219(-)	AT3G13410	chr3:4361857-4364262(-)
MI0000980	ath-MIR169f	chr3:4805684-4805850(-)	AT3G14390	chr3:4806725-4809433(+)
MI0017892	ath-MIR5023	chr3:5496985-5497119(-)	AT3G16220	chr3:5497597-5499235(+)
MI0013364	ath-MIR2934	chr3:5500032-5500152(-)	AT3G16230	chr3:5500178-5503545(+)
MI0005112	ath-MIR782	chr3:5500037-5500147(+)	AT3G16220	chr3:5497597-5499235(+)
MI0015818	ath-MIR3440b	chr3:6217476-6217600(+)	AT3G18140	chr3:6212596-6214785(-)
MI0005446	ath-MIR868	chr3:6488234-6488426(+)	AT3G18820	chr3:6484068-6486247(+)
MI0001429	ath-MIR418	chr3:6516218-6516290(+)	AT3G18890	chr3:6511023-6514994(+)
MI0000217	ath-MIR173	chr3:8236153-8236254(+)	AT3G23120	chr3:8227222-8229576(-)
MI0005408	ath-MIR853	chr3:8346367-8346656(+)	AT3G23325	chr3:8345771-8347062(+)	ingene
MI0005404	ath-MIR849	chr3:16072449-16072637(-)	AT3G44450	chr3:16074096-16074678(-)
MI0005399	ath-MIR843	chr3:17742098-17742302(+)	AT3G48050	chr3:17733533-17739412(-)
MI0000214	ath-MIR171a	chr3:19073434-19073556(+)	AT3G51370	chr3:19069363-19072195(+)
MI0019205	ath-MIR5633	chr3:19544751-19545106(+)	AT3G52730	chr3:19542931-19544264(-)
MI0005101	ath-MIR771	chr3:19659301-19659413(-)	AT3G53020	chr3:19660517-19662025(-)
MI0005406	ath-MIR851	chr3:19659532-19659715(-)	AT3G53020	chr3:19660517-19662025(-)
MI0000992	ath-MIR172d	chr3:20587904-20588027(+)	AT3G55510	chr3:20578978-20582405(+)
MI0000992	ath-MIR172d	chr3:20587904-20588027(+)	AT3G55510	chr3:20578978-20582405(+)
MI0019247	ath-MIR1888b	chr3:22537283-22537417(+)	AT3G60960	chr3:22535706-22538635(+)	ingene
MI0000209	ath-MIR167b	chr3:23406168-23406276(+)	AT3G63370	chr3:23402076-23405991(+)
MI0005382	ath-MIR826	chr4:1340479-1340656(+)	AT4G03030	chr4:1335729-1337368(-)
MI0005388	ath-MIR832	chr4:6413010-6413342(+)	AT4G10340	chr4:6408016-6409677(+)
MI0017898	ath-MIR5028	chr4:6546647-6546827(-)	AT4G10600	chr4:6547786-6548864(-)
MI0017893	ath-MIR5020b	chr4:6787003-6787153(-)	AT4G11140	chr4:6794776-6795793(-)
MI0016588	ath-MIR3932b	chr4:7890570-7890719(-)	AT4G13575	chr4:7892320-7893705(-)
MI0005407	ath-MIR852	chr4:8336166-8336373(+)	AT4G14500	chr4:8334176-8337273(+)	ingene
MI0019249	ath-MIR5661	chr4:10449329-10449409(+)	AT4G19070	chr4:10446340-10448190(-)
MI0015820	ath-MIR4240	chr4:10711558-10711762(-)	AT4G19700	chr4:10713561-10714707(-)
MI0017885	ath-MIR5017	chr4:11962901-11963078(-)	AT4G22770	chr4:11963628-11965684(-)
MI0005409	ath-MIR824	chr4:12625094-12625782(+)	AT4G24410	chr4:12623530-12624039(-)
MI0005384	ath-MIR828	chr4:13846971-13847161(+)	AT4G27760	chr4:13844065-13846746(+)
MI0001430	ath-MIR419	chr4:15660370-15660475(+)	AT4G32440	chr4:15656681-15660223(+)
MI0010631	ath-MIR2111b	chr5:400358-400524(+)	AT5G02030	chr5:395634-399041(+)
MI0005379	ath-MIR822	chr5:897020-897356(-)	AT5G03555	chr5:898241-900159(-)
MI0000194	ath-MIR162a	chr5:2634905-2635044(-)	AT5G08190	chr5:2635902-2637433(+)
MI0000203	ath-MIR166c	chr5:2838635-2838773(+)	AT5G08710	chr5:2834743-2838090(-)
MI0000204	ath-MIR166d	chr5:2840622-2840734(+)	AT5G08710	chr5:2834743-2838090(-)
MI0000181	ath-MIR156d	chr5:3456632-3456749(-)	AT5G10946	chr5:3455607-3457306(-)	ingene
MI0019200	ath-MIR5629	chr5:3802714-3803062(+)	AT5G11790	chr5:3799550-3802792(+)
MI0000182	ath-MIR156e	chr5:3867207-3867313(+)	AT5G11970	chr5:3863071-3863755(-)
MI0005403	ath-MIR848	chr5:4479397-4479591(-)	AT5G13890	chr5:4478843-4480928(-)	ingene
MI0001018	ath-MIR398b	chr5:4691022-4691137(+)	AT5G14540	chr5:4687147-4689674(-)
MI0001019	ath-MIR398c	chr5:4694694-4694808(+)	AT5G14550	chr5:4691006-4694055(-)
MI0019207	ath-MIR5635a	chr5:6926005-6926446(+)	AT5G20480	chr5:6922480-6925887(+)
MI0008305	ath-MIR1888a	chr5:7168870-7168969(+)	AT5G21100	chr5:7168184-7170928(+)	ingene
MI0014667	ath-MIR3434	chr5:7583055-7583403(-)	AT5G22770	chr5:7579263-7588249(-)	ingene
MI0005437	ath-MIR860	chr5:9098791-9098916(+)	AT5G26030	chr5:9096460-9099185(+)	ingene
MI0019241	ath-MIR5657	chr5:9789582-9789666(+)	AT5G27650	chr5:9785407-9789232(+)
MI0005443	ath-MIR866	chr5:16157823-16157948(-)	AT5G40390	chr5:16161515-16165357(+)
MI0019243	ath-MIR5659	chr5:16409804-16409862(-)	AT5G40945	chr5:16410585-16410665(+)
MI0019218	ath-MIR5644	chr5:16649994-16650138(+)	AT5G41620	chr5:16646330-16648968(+)
MI0000545	ath-MIR319b	chr5:16660469-16660640(-)	AT5G41670	chr5:16665283-16667171(-)
MI0000206	ath-MIR166f	chr5:17516301-17516405(+)	AT5G43600	chr5:17512476-17515495(+)
MI0000192	ath-MIR160c	chr5:19009094-19009182(-)	AT5G46850	chr5:19010608-19012038(+)
MI0001083	ath-MIR156h	chr5:22597012-22597117(-)	AT5G55840	chr5:22598038-22602566(+)
MI0001089	ath-MIR172e	chr5:23988472-23988596(+)	AT5G59500	chr5:23985929-23987381(+)
MI0000213	ath-MIR170	chr5:26411580-26411672(-)	AT5G66050	chr5:26412088-26414536(-)
